# Supplementary material
Source: PubMed Central journal article supplement (PMC3353120)
Supplement: NIHMS30176-supplement-Figure_S3.pdf [file NIHMS30176-supplement-Figure_S3.pdf]

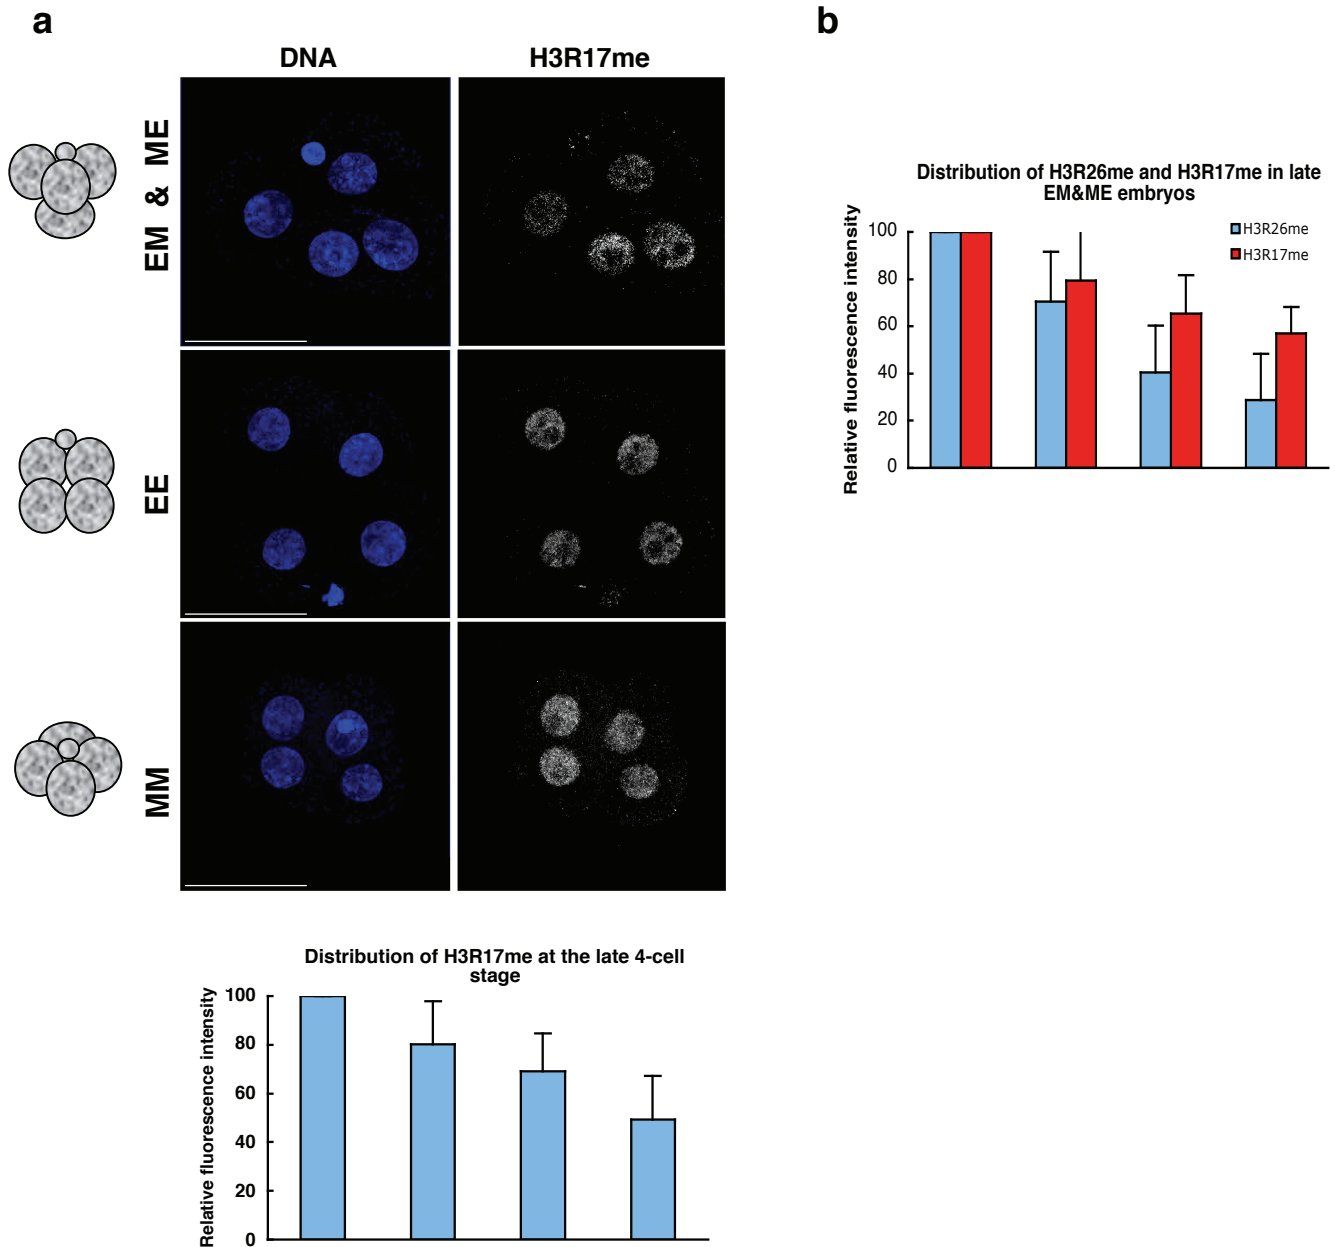

**Figure S3.** Freshly collected four cell stage embryos were processed for immunostaining with a H3R17me (n=8) antibody and analysed under confocal microscopy. DNA is shown in blue. Shown are projections of representative embryos including all sections, which were taken every 0.8  $\mu\text{m}$ . Embryos were grouped according to their shape in tetrahedral (EM and ME), EE or MM embryos. Scale bar 50  $\mu\text{m}$ . The levels of fluorescence were quantified as in Figure 1. Quantification of the fluorescence levels, which were plotted relative to the blastomere that displays highest fluorescence levels (which was set at 100% for each embryo) is shown. In the graphs, each bar corresponds to the relative levels of fluorescence of single 4-cell stage blastomeres. (b) Comparison of the distribution of H3R26me (blue bars) and H3R17me (red bars) in tetrahedral (EM and ME) 4-cell stage embryos.
