# Supplementary material
Source: PubMed Central journal article supplement (PMC3353120)
Supplement: NIHMS30176-supplement-Figure_S4.pdf [file NIHMS30176-supplement-Figure_S4.pdf]

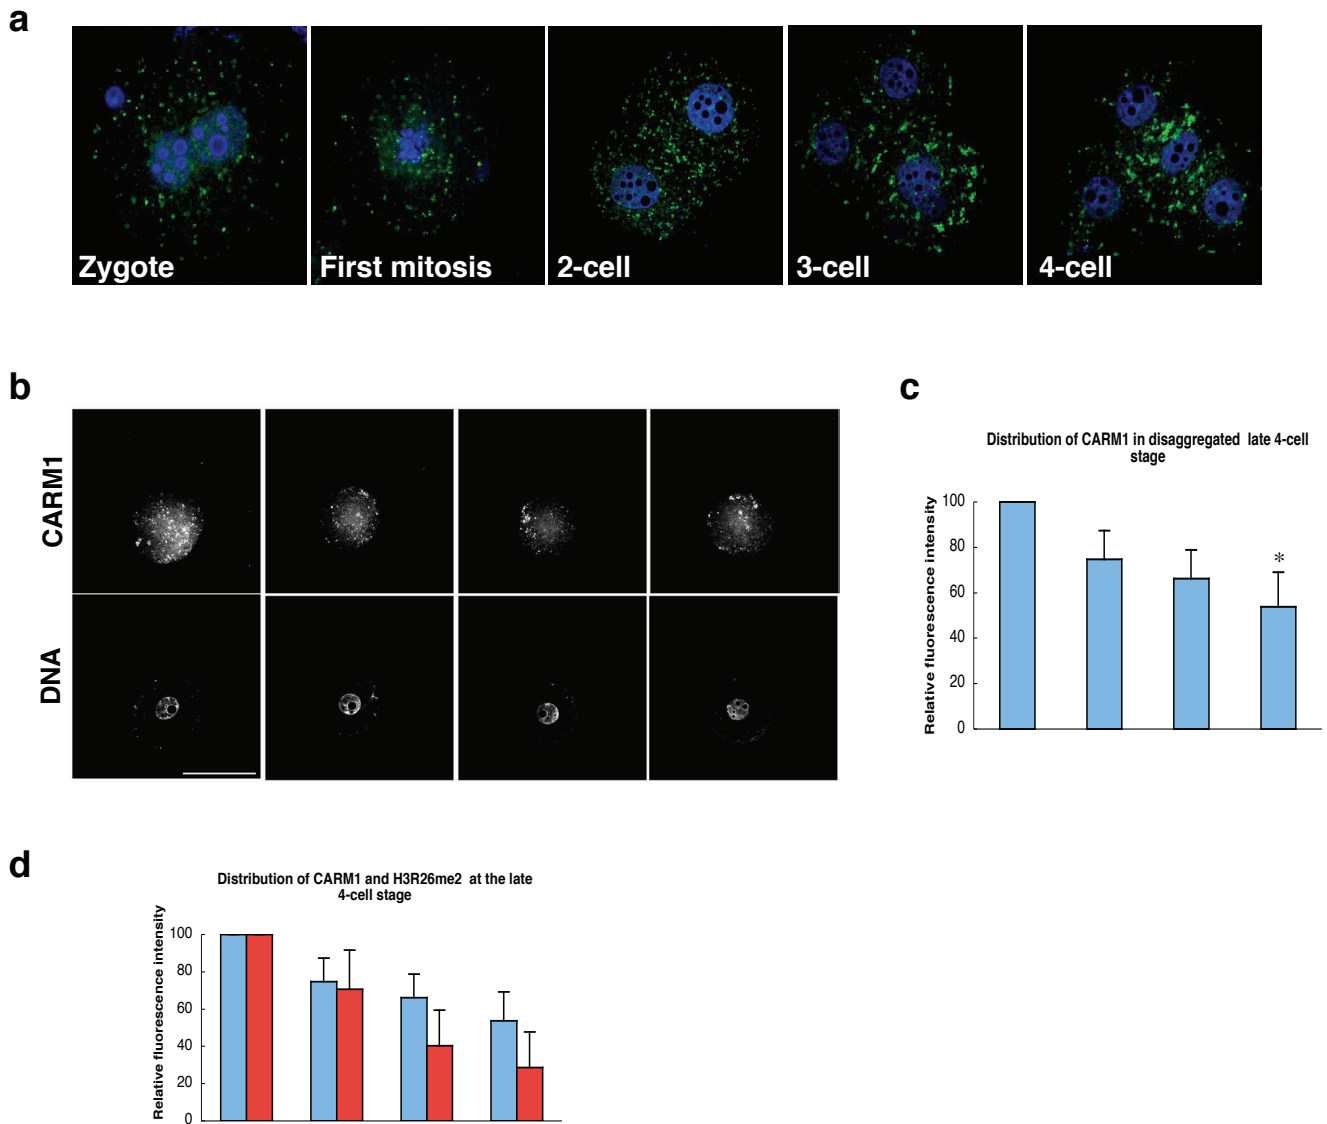

**Figure S4. Localisation of CARM1 in the mouse preimplantation embryo: differential distribution of CARM1 in 4-cell stage blastomeres.**

(a) CARM1 exhibits both nuclear and cytoplasmic localisation in dots throughout all the stages analysed. Embryos were collected following hormonal induction at the indicated stages, fixed and processed for immunostaining with a CARM1 antibody (Upstate, green). DNA is shown in blue. Images were captured using a 60x oil objective in a BioRad Radiance Upright Confocal Laser Microscope. Shown are representative single optical sections of 10 embryos examined per stage.

(b) Levels of CARM1 are different in the blastomeres of the 4-cell stage embryo. Freshly collected tetrahedral four cell stage embryos were processed for immunostaining with a CARM1 antibody. The cells of individual embryos were then disaggregated and scanned under confocal microscopy separately. Shown are projections of the 4 blastomeres of a representative embryo (n=8). Sections were taken every 0.8  $\mu\text{m}$ . Scale bar 10  $\mu\text{m}$ .

(c) Total levels (nuclear and cytoplasmic) of CARM1 fluorescence were quantified through Z-planes using the Volocity software and normalised against the blastomere showing the highest level which was set at 100%. Decreasing values of fluorescence were calculated, normalised in each embryo and averaged accordingly (\*  $p=0.0002$ ). Each bar represents the relative fluorescence level of each of the 4-cell stage blastomeres.

(d) Comparison of the distribution of CARM1 (blue bars) and H3R26me2 (red bars) in tetrahedral (EM and ME) 4-cell stage embryos.
