# Supplementary material
Source: PubMed Central journal article supplement (PMC3353120)
Supplement: NIHMS30176-supplement-Figure_S6.pdf [file NIHMS30176-supplement-Figure_S6.pdf]

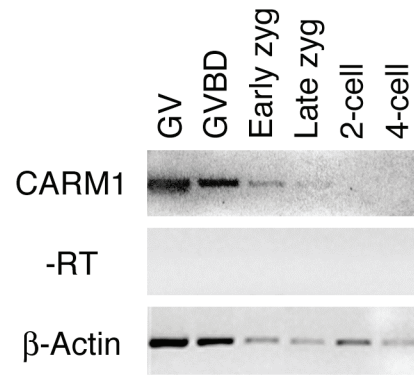

**Figure S6.**

**CARM1 is expressed maternally and its transcripts are downregulated by the 2-cell stage.** RT-PCR analysis of CARM1 was performed in freshly collected oocytes (15 oocytes), zygotes (15 embryos), 2-cell stage (15), and 4-cell stage embryos (5). cDNA samples were amplified for 35 cycles. *GV*, germinal vesicle, *GVBD*, germinal vesicle breakdown.
