# Supplementary material
Source: PubMed Central journal article supplement (PMC3353120)
Supplement: NIHMS30176-supplement-Figure_S7.pdf [file NIHMS30176-supplement-Figure_S7.pdf]

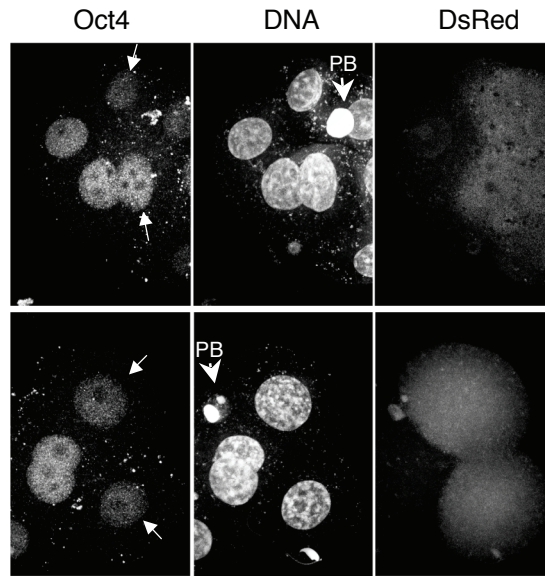

**Figure S7.**

**Expression levels of Oct4 upon overexpression of CARM1 remain unchanged.**

One blastomere of 2-cell stage embryos was injected with mRNA for CARM1.HA and DsRed. Embryos were analysed by immunofluorescence with an Oct4 antibody between the 6- and 8-cell stage. Shown are 4 nuclei of two different embryos, with two of them deriving from the CARM1 overexpressing blastomere (white arrows, note the presence of DsRed). Oct4 protein levels are variable and there was no correlation in this variation whether the blastomeres derived from the 2-cell stage blastomere injected with CARM1 mRNA or not (n=18) PB, polar body.
